**Title:** A cell-based evaluation of a non-essential amino acid formulation as a non-bioactive control for activation and stimulation of muscle protein synthesis using *ex vivo* human serum

**Authors:** Bijal Patel<sup>a,b,c</sup>, Martina Pauk<sup>a,b,c</sup>, Miryam Amigo-Benavent<sup>a,b,c,d</sup>, Alice B. Nongonierma<sup>a,e</sup>, Richard J. Fitzgerald<sup>a,e</sup>, Philip M. Jakeman<sup>a,b,c,d</sup>, Brian P. Carson<sup>a,b,c,d</sup>.

**Affiliations:**

a. Food for Health Ireland

b. Human Sciences Research Unit, University of Limerick, Ireland

c. Department of Physical Education & Sport Sciences, Faculty of Education and Health Sciences, University of Limerick, Ireland.

d. Centre for Intervention in Infection, Inflammation and Immunity (4i), University of Limerick, Ireland.

e. Department of Biological Sciences, University of Limerick, Ireland

**Corresponding Author:**

Brian P. Carson, PhD

Department of Physical Education & Sport Sciences, Faculty of Education and Health Sciences, University of Limerick, Ireland.

Email address: [brian.carson@ul.ie](mailto:brian.carson@ul.ie)

Phone: +353 (0)61234943

**ORCID:** Brian P. Carson <http://orcid.org/0000-0001-8350-1481>

**Conflict of interest:**

The authors declare no conflict of interest.

## Abstract:

**Purpose:** The purpose of this study was to compare the effect of treating skeletal muscle cells with media conditioned by postprandial *ex vivo* human serum fed with either isonitrogenous NEAA or a whey protein hydrolysate (WPH) on stimulating MPS in C2C12 skeletal muscle cells. **Methods:** Blood was taken from six young healthy males following overnight fast (fasted) and 60 min postprandial (fed) ingestion of either WPH or NEAA (0.33 g.kg<sup>-1</sup> Body Mass). C2C12 myotubes were treated with media conditioned by *ex vivo* human serum (20%) for 4 h. Activation of MPS signalling (phosphorylation of mTOR, P70S6K and 4E-BP1) were determined *in vitro* by Western Blot and subsequent *de novo* MPS were determined *in vitro* by Western Blot and surface sensing of translation technique (SUnSET) techniques, respectively. **Results:** Media conditioned by NEAA fed serum had no effect on protein signalling or MPS compared to fasted, whereas media conditioned by WPH fed serum significantly increased mTOR, P70S6K and 4E-BP1 phosphorylation (p<0.01, p<0.05) compared to fasted serum. Furthermore, the effect of media conditioned by WPH fed serum on protein signalling and MPS was significantly increased (p<0.01, p<0.05) compared to NEAA fed serum. **Conclusion:** In summary, media conditioned by NEAA fed serum did not result in activation of MPS. Therefore, these *in vitro* findings suggest the use of isonitrogenous NEAA acts as an effective control for comparing bioactivity of different proteins on activation of MPS. These findings also confirm that activation of MPS in C2C12 myotubes treated with media conditioned by WPH-fed serum is primarily due to circulating EAA.

**Keywords:** bioactive; amino acid; serum; muscle protein synthesis; skeletal muscle.

## 1. Introduction

Muscle protein synthesis (MPS) is integral to the repair, growth and maintenance of skeletal muscle and sensitive to nutrient ingestion. Several studies have assessed the role of protein and amino acids in the regulation of MPS (1-4). The importance of appropriate controls in establishing the bioactivity of compounds in human MPS studies has been emphasised in recent reviews by Morton et al. (5) and Phillips (6). These meta-analyses include many studies reporting on the effects of amino acid and protein supplementation on MPS which use either a less appropriate (including carbohydrate and collagen) or no feeding control/placebo (5, 7, 8). Furthermore, the European Food Safety Authority (EFSA) advises "human intervention studies assessing the effect of a specific protein source/constituent against another isonitrogenous protein source/constituent were considered as pertinent to the claim, whereas studies controlling for energy only (e.g. using isocaloric carbohydrate sources as placebo) could not be used for the scientific substantiation of these claims" (9) as comparisons of a test protein to isoenergetic, but not isonitrogenous carbohydrate control is more likely to show an effect of protein supplementation (6). Therefore, validation of appropriate non-bioactive isonitrogenous controls is important for the future evaluation of bioactivity of protein formulations.

Studies assessing the role of protein and amino acids in the regulation of MPS establish a close relationship between the extracellular concentration of essential amino acids (EAA) and the rate of MPS (2, 10, 11), and leucine as the most potent in *in vitro* (12) and human studies (8, 13-16). The efficacy of protein and/or amino acid intake to stimulate MPS thereby depends on the pattern and magnitude of change in extracellular EAA evoked following ingestion that, in turn, is dependent on the type, amount and timing of protein or amino acid ingestion. Previous studies also indicate that co-ingestion of non-essential amino acids (NEAA) is surplus to requirement to stimulate MPS (1-4, 17) which is, perhaps, unsurprising as (NEAA) are considered readily available in plasma, interstitial and intracellular muscle compartments. Therefore, a balanced mix of NEAA may also act as an appropriate isonitrogenous control (null) to assess the effect of specific proteins on MPS in humans.

We have recently developed a muscle cell-based model to evaluate the MPS response to ingestion of milk proteins and their derivatives (18). In this model, conditioning media with human serum resulted in an increase in *de novo* MPS in fully differentiated C2C12 skeletal muscle cells. Furthermore, it was also possible to demonstrate that conditioning media with human serum sampled 60 min post-ingestion of whey protein stimulated MPS in mature C2C12 myotubes to a greater extent than serum sampled after an overnight fast (18). Whey is a high EAA (~50% EAA) containing, soluble milk protein proven to stimulate MPS in young and elderly populations (19, 20).

Ingestion of  $\sim 0.33\text{g.kg}^{-1}$  body mass whey protein results in post-ingestion aminoacidaemia and an increase in circulating EAA of approximately 3-fold within 60 min (18). Though equivocal, it seemed plausible to suggest the augmented MPS response of myotubes exposed to ‘fed’ vs. ‘fasted’ serum conditioned media was due to the increase in circulating EAA in fed serum and that a similar aminoacidaemia through increase in [NEAA] would not result in an increase in MPS. To test this hypothesis, we fed a NEAA formulation designed by Norton et al. (*in review*), isonitrogenous to whey protein, to human participants. Using the C2C12 *in vitro* model established previously (18), serum sampled pre- and post-feeding was used to condition media of C2C12 myotubes to evaluate change in intracellular signalling and *de novo* MPS. The purpose of this study was to evaluate i) if treating skeletal muscle cells with media conditioned by human serum fed a NEAA formulation resulted in increased intracellular signalling and *de novo* MPS and (ii) if media conditioned by human serum fed a NEAA formulation was comparable to the effect of media conditioned by human serum fed WPH.

## 2. Materials and Methods

### 2.1 Ethical Approval

The study was approved by the local ethics committee at the University of Limerick (EHSREC\_2013\_01\_13) and conformed to the standards set by the Declaration of Helsinki. Six young healthy male participants, ( $26 \pm 4.7$  y;  $77.7 \pm 10.1$  kg,  $1.77 \pm 0.08$  m,  $25 \pm 3.3$  kg·m<sup>-2</sup>,  $19 \pm 6.9$  % BF) agreed to participate in the study, gave informed written consent and completed the intervention trial.

### 2.2 Study design

Participants reported to the lab following an overnight fast (>10 h) and having not exercised in the previous 24 h on two separate occasions, separated by at least 7 d. A blood sample from the antecubital vein was collected at baseline ( $t=0$  min) by a clinical nurse on each day as described previously (18). Administered double blind participants consumed  $0.33$  g·kg<sup>-1</sup> body mass of either an isonitrogenous non-bioactive NEAA control beverage or a WPH (500 mL; 7.6% w/v) beverage within 5 min (Table 1). As aminoacidemia and MPS have been previously shown to peak between 45-90 min following protein feeding (21, 22), an additional blood sample was collected 60 min postprandial.

**Table 1.** Composition of WPH and isonitrogenous NEAA. Dose scaled per kg body mass ( $0.33$  g·kg<sup>-1</sup>), and amount reported typical for an 80 kg participant. BCAA, branched chain amino acids; EAA, essential amino acids; NEAA, non-essential amino acids; AA, amino acids.

|                              | WPH  | NEAA Control |
|------------------------------|------|--------------|
| Energy (kJ)                  | 545  | 442          |
| Degree of hydrolysis (%)     | 13.1 | 0            |
| <b>Macronutrient Content</b> |      |              |
| Protein or AA (g)            | 26.4 | 26.4         |
| Carbohydrate (g)             | 1.6  | 0            |
| Fat (g)                      | 2.0  | 0            |
| <b>EAA</b>                   |      |              |
| Leucine (g)                  | 2.9  | 0            |
| Isoleucine (g)               | 1.7  | 0            |
| Valine (g)                   | 1.6  | 0            |
| Histidine (g)                | 0.5  | 0            |
| Lysine (g)                   | 2.6  | 0            |
| Methionine (g)               | 0.6  | 0            |
| Phenylalanine (g)            | 0.9  | 0            |
| Threonine (g)                | 2.0  | 0            |
| Tryptophan (g)               | 0.5  | 0            |
| <b>NEAA</b>                  |      |              |
| Alanine (g)                  | 1.4  | 2.7          |
| Arginine (g)                 | 0.7  | 0            |

|                       |             |             |
|-----------------------|-------------|-------------|
| Aspartic Acid (g)     | 3.0         | 3.2         |
| Cysteine (g)          | 0.7         | 0           |
| Glutamic Acid (g)     | 4.9         | 9.6         |
| Glycine (g)           | 0.5         | 1.1         |
| Proline (g)           | 1.7         | 4.3         |
| Serine (g)            | 1.4         | 3.6         |
| Tyrosine (g)          | 0.8         | 2.0         |
| <b>Total BCAA (g)</b> | <b>6.3</b>  | <b>0</b>    |
| <b>Total EAA (g)</b>  | <b>13.3</b> | <b>0</b>    |
| <b>Total NEAA (g)</b> | <b>15.1</b> | <b>26.4</b> |

### 2.3 Amino acid analysis

Plasma amino acid (AA) profile of each participant at 0 and 60 min postprandial was determined as reported previously (23) on the Agilent 1200 RP-UPLC system (Agilent Technologies, Santa Clara, CA, USA) equipped with an Agilent 1260 binary pump and a G1367C automated liquid handling system. AA separation, data acquisition and quantitative analysis was performed as discussed previously (18).

### 2.4 Metabolic/Humoral biomarker analysis

Plasma insulin was determined using a commercial kit (Merck Millipore) on a MAGPIX<sup>TM</sup> Multiplex reader and processed using Bio-Plex Manager<sup>TM</sup> MP.

### 2.5 Cell culture

*In vitro* analysis was carried out using the murine skeletal muscle cell line C2C12. Cells were cultured, sub-cultured and differentiated (up to 7 d) in DMEM medium as previously described (18, 24). Prior to treatment with media conditioned by human serum, fully differentiated myotubes were nutrient deprived in an AA and serum free DMEM medium (US biological, Salem, MA, USA), supplemented with 1 mM sodium pyruvate (GE Healthcare, Thermo-Fisher), 1% (v/v) penicillin/streptomycin solution, 1 mM L-glutamine, 6 mM D-glucose (Sigma-Aldrich), and 34 mM NaCl (Sigma-Aldrich) (pH 7.3).

### 2.6 Muscle Protein Synthesis

The surface sensing of translation technique (SUnSET) (25) was used to measure muscle protein synthesis in C2C12 myotubes following treatment with media conditioned by *ex vivo* human serum (fed or fasted). Differentiated and mature C2C12 myotubes were nutrient deprived in AA and serum free DMEM medium for 1 h, following which they were treated with media containing 20% human serum (fed or fasted) and 1  $\mu$ M puromycin (Merck Millipore Limited) for a further 4 h. The optimum nutrient deprivation time, puromycin,

conditioned media treatment time and percentage human serum used has been established previously (18). MPS and protein signalling was determined from cell lysates as described previously (18, 24) and MPS and protein signalling was determined using immunoblotting. Mammalian target of rapamycin complex 1 (mTOR), ribosomal S6 kinase (P70S6K) and eukaryotic initiation factor 4E binding protein 1 (4E-BP1) were the chosen protein signalling targets.

## 2.7 Immunoblotting

Protein lysates (30 µg) were denatured and separated by gel electrophoresis using 4-15% linear gradient SDS-PAGE precast gels (Mini-Protean TGX Stain-free, Bio-Rad 456-8083). Following electrophoresis, total protein (loading control) in each lane of the gel was determined using stain-free UV-induced fluorescence that activates tryptophan residues on the gel (UVITEC Cambridge Imaging system, UVITEC, Cambridge, UK). Semi-dry transfer technique (Trans-blot® Turbo™ Bio-Rad) was adapted to transfer proteins from the UV-activated gel onto a 0.2 µm nitrocellulose membrane. Membranes were probed with the primary antibodies for puromycin (MABE343 anti-puromycin, clone 12D10 mouse monoclonal, Merck Millipore Limited), phosphorylated-4E-BP1 (Thr37/46), 4E-BP1, phosphorylated-P70S6K (Thr389), P70S6K, phosphorylated-mTOR (Ser2448), mTOR and the reference protein β-actin (Cell Signaling). Protein quantification was determined using fluorescence, and membranes were probed with IRDye® 800CW anti-rabbit secondary antibody (926-32211, LI-COR Biosciences UK Ltd, UK) for all proteins except puromycin where IRDye® 800CW goat anti-mouse IgG2a-specific (LI-COR Biosciences UK Ltd) secondary antibody was used. Images were captured in the UVITEC Cambridge Imaging system (UVITEC, Cambridge, UK) and single band and whole-lane (puromycin and total protein) band densitometry was conducted using NineAlliance UVITEC Software (UVITEC, Cambridge, UK).

## 2.8 Statistical analysis

GraphPad Prism v7.03 was used for statistical analysis. Data were tested for normality (Shapiro-Wilk test) and homogeneity of variances (Levene's test). Paired Samples *T*-tests were used to analyse differences in the plasma [insulin] and [AA] between fasted and fed human condition. Paired sample *T*-Test was used to establish if media conditioned by human serum sampled post-ingestion of the NEAA formulation resulted in increased intracellular signalling and *de novo* MPS in C2C12 myotubes and un-paired sample *T*-Test to establish if these effects were different to the effect of media conditioned by human serum sampled post-ingestion of WPH. The level of significance was set at 95 % ( $p < 0.05$ ).

### 3. Results

Plasma [insulin] and [AA] following an overnight fast and 60 min following WPH or NEAA ingestion (0.33 g.kg<sup>-1</sup> body mass) are presented in Table 2. Relative to fasting, [AA] increased significantly following WPH ingestion (p<0.05) and only[NEAA] and [threonine]increased following ingestion of NEAA (p<0.05) (**Table 2**). Total [EAA] increased by 97% following WPH ingestion but remained at fasted levels following ingestion of NEAA. Total [NEAA] increased 34% and 55% following WPH and NEAA ingestion, respectively. Plasma [insulin] increased by 44% following WPH (p<0.05) and 41% following NEAA ingestion (p<0.05).

**Table 2. Plasma insulin and amino acid at baseline (0 min) and postprandial (60 min).**

EAA, essential amino acids; NEAA, non-essential amino acids.

|                            | WPH       |            |           | NEAA Control |             |                       |
|----------------------------|-----------|------------|-----------|--------------|-------------|-----------------------|
| Time (min)                 | 0         | 60         | Δ (0-60)  | 0            | 60          | Δ (0-60)              |
| <b>Humoral Biomarkers</b>  |           |            |           |              |             |                       |
| Insulin (pM)               | 92 ± 33   | 133±38*    | 41 ± 14   | 67 ± 26      | 95 ± 31*    | 28 ± 6                |
| <b>EAA (μmol/L)</b>        |           |            |           |              |             |                       |
| Leucine                    | 127 ± 5   | 333 ± 11*  | 207 ± 11  | 151 ± 13     | 138 ± 10    | -13 ± 7 <sup>#</sup>  |
| Isoleucine                 | 63 ± 5    | 195 ± 11*  | 133 ± 8   | 74 ± 8       | 67 ± 6      | -7 ± 4 <sup>#</sup>   |
| Valine                     | 228 ± 7   | 398 ± 10*  | 170 ± 9   | 246 ± 16     | 242 ± 12    | -5 ± 9 <sup>#</sup>   |
| Histidine                  | 77 ± 2    | 91 ± 4*    | 14 ± 3    | 83 ± 5       | 85 ± 4      | 2 ± 3 <sup>#</sup>    |
| Lysine                     | 183 ± 8   | 363 ± 17*  | 180 ± 13  | 172 ± 14     | 183 ± 14    | 11 ± 6 <sup>#</sup>   |
| Methionine                 | 22 ± 3    | 45 ± 2*    | 23 ± 4    | 26 ± 2       | 26 ± 2      | 0 ± 1 <sup>#</sup>    |
| Phenylalanine              | 53 ± 2    | 71 ± 3*    | 18 ± 1    | 57 ± 5       | 51 ± 11*    | -6 ± 2 <sup>#</sup>   |
| Threonine                  | 117 ± 12  | 230 ± 14*  | 112 ± 5   | 108 ± 9      | 151 ± 11*   | 44 ± 4 <sup>#</sup>   |
| Tryptophan                 | 67 ± 4    | 124 ± 7*   | 57 ± 5    | 72 ± 8       | 71 ± 6      | -1 ± 4 <sup>#</sup>   |
| <b>Total EAA (μmol/L)</b>  | 936 ±28   | 1849 ±45*  | 914 ± 41  | 989 ± 67     | 1013 ± 55   | 24 ± 37 <sup>#</sup>  |
| <b>NEAA (μmol/L)</b>       |           |            |           |              |             |                       |
| Alanine                    | 267 ± 33  | 416 ± 40*  | 148 ± 12  | 326 ± 37     | 571 ± 56*   | 245 ± 20 <sup>#</sup> |
| Arginine                   | 76 ± 5    | 127 ± 9*   | 52 ± 7    | 80 ± 9       | 79 ± 8      | -1 ± 5 <sup>#</sup>   |
| Asparagine                 | 125 ± 8   | 187 ± 12*  | 62 ± 5    | 131 ± 20     | 255 ± 18*   | 125 ± 22 <sup>#</sup> |
| Aspartic acid              | 0 ± 0     | 4 ± 1*     | 3 ± 1     | 0 ± 0        | 11 ± 2*     | 11 ± 2 <sup>#</sup>   |
| Glutamine                  | 547 ± 20  | 653 ± 37*  | 106 ± 20  | 616 ± 33     | 746 ± 43*   | 131 ± 23              |
| Glutamic acid              | 48 ± 11   | 63 ± 7*    | 14 ± 6    | 36 ± 8       | 137 ± 13*   | 101 ± 12 <sup>#</sup> |
| Glycine                    | 215 ± 20  | 248 ± 24*  | 33 ± 6    | 186 ± 17     | 328 ± 30*   | 143 ± 15 <sup>#</sup> |
| Tyrosine                   | 62 ± 4    | 100 ± 6*   | 38 ± 3    | 60 ± 7       | 98 ± 11*    | 38 ± 5                |
| <b>Total NEAA (μmol/L)</b> | 1341 ± 59 | 1798 ± 72* | 457 ± 18  | 1433 ± 92    | 2227 ± 126* | 793 ± 66 <sup>#</sup> |
| <b>Total AA (μmol/L)</b>   | 2276 ± 81 | 3647 ± 67* | 1371 ± 33 | 2422 ± 149   | 3239 ± 175* | 817 ± 97 <sup>#</sup> |

*Data are Mean ± SEM (n=6); NA: Not Available; \*within groups p<0.05 and <sup>#</sup>between groups p<0.05*



Cells treated with media conditioned by WPH-fed serum observed significantly increased mTOR activation ( $p<0.01$ ) (**Figure 1**) relative to its corresponding fasted serum (**Figure 1A, 1B**). This increase in mTOR activation was consistently observed in serum from each participant ( $n=6$ ) (**Figure 1A**). In comparison, NEAA-fed serum did not activate mTOR (**Figure 1**) which remained at a similar level to its corresponding fasted serum (**Figure 1A, 1B**). Furthermore, when normalised to corresponding fasted serum (**Figure 1B**) mTOR activation in the WPH-fed condition was significantly increased ( $p<0.01$ ) compared to the NEAA-fed condition.

# **INSERT FIGURE 1 HERE**

**Figure 1** Phosphorylation of mTOR in response to treatment with media conditioned by *ex vivo* human serum ( $n=6$ ). C2C12 myotubes were nutrient deprived for 1 h followed by treatment with media conditioned by fasted (**fast**) or 60 min postprandial (**fed**) *ex vivo* serum for 4 h. Postprandial serum was obtained 1 h after ingesting WPH or isonitrogenous NEAA. Densitometric analysis of (**A**) mTOR phosphorylation before and after treatment with media conditioned by WPH or NEAA-fed *ex vivo* serum and (**B**) relative to fasted *ex vivo* serum. (**C**) Representative immunoblot of mTOR phosphorylation relative to total mTOR and  $\beta$ -Actin. Data reported as Mean $\pm$ SEM, \*\**within groups*  $p<0.01$ , ##*between groups*  $p<0.01$

Stimulation of the downstream targets of mTOR activation, P70S6K and 4E-BP1, occurred following treatment of C2C12 myotubes with media conditioned by serum (**Figure 2**). Like mTOR, P70S6K (**Figure 2A, 2B**) and 4E-BP1 (**Figure 2C, 2D**) activation was significantly increased ( $p<0.05$ ) in the WPH-fed condition relative to its corresponding fasted serum. Comparatively, no change in P70S6K (**Figure 2A, 2B**) or 4E-BP1 (**Figure 2C, 2D**) phosphorylation relative to fasted, following treatment with media conditioned by NEAA-fed serum was evident. This was consistently observed in each participant (**Figure 2A, 2C**). A significant increase ( $p<0.05$ ) in P70S6K (**Figure 2B**) and 4E-BP1 (**Figure 2D**) phosphorylation was observed in media conditioned by WPH-fed compared to NEAA-fed serum (Unpaired T-test).

# **INSERT FIGURE 2 HERE**

**Figure 2** Phosphorylation of P70S6K and 4E-BP1 in response to treatment with media conditioned by *ex vivo* human serum ( $n=6$ ). C2C12 myotubes were nutrient deprived for 1 h followed by treatment with media conditioned by *ex vivo* fasted (**fast**) or 60 min postprandial (**fed**) serum for 4 h. Postprandial serum was obtained 1 h after ingesting WPH or isonitrogenous NEAA. Densitometric analysis of P70S6K and 4E-BP1 phosphorylation before and after treatment with media conditioned by WPH or NEAA-fed serum (**A, C**) and

relative to fasted serum (**B, D**). Representative immunoblots of P70S6K (**E**) and 4E-BP1 (**F**) phosphorylation relative to their respective total proteins and  $\beta$ -Actin. Data reported as Mean $\pm$ SEM, \**within groups*  $p<0.05$ , #*between groups*  $p<0.05$

The SunSET technique (25) was adopted to verify that mTOR, P70S6K and 4E-BP1 activation led to an increase in *de novo* MPS in skeletal muscle cells. No statistically significant increase in MPS occurred in skeletal muscle cells treated with media conditioned by NEAA-fed or WPH-fed serum when compared to treatment with media conditioned by their corresponding fasted serum (**Figure 3**). However, normalised to the corresponding fasted serum, significantly greater MPS was detected in the cells treated with media conditioned by WPH-fed compared with NEAA-fed serum ( $p<0.05$ ) (**Figure 3B**).

## INSERT FIGURE 3 HERE

**Figure 3** MPS in response to treatment with media conditioned by *ex vivo* human serum (n=6). C2C12 myotubes were nutrient deprived for 1 h followed by treatment with *ex vivo* fasted (**fast**) or 60 min postprandial (**fed**) human serum for 4 h. Postprandial serum was obtained 1 h after ingesting WPH or isonitrogenous NEAA. Densitometric analysis of (**A**) MPS before and after treatment with media conditioned by WPH or NEAA-fed serum and (**B**) relative to fasted serum. (**C**) Representative immunoblot of MPS (measured by puromycin incorporation) relative to total protein (loading control). Data reported as Mean $\pm$ SEM, #*between groups*  $p<0.05$

## 4. Discussion

The importance of the use of appropriate negative controls in human MPS studies has recently been emphasised by key opinion leaders in the field (5, 6). Many studies in these meta-analyses report on the effects of amino acid and protein supplementation on MPS in humans which use less appropriate controls (5, 7, 8). In line with the scientific opinion of EFSA, that human intervention studies assessing the effect of different proteins on physiological processes require an isonitrogenous comparator, a NEAA-only containing formulation isonitrogenous to whey protein, was fed to human participants in equal dose to a whey protein hydrolysate. Fed and fasted serum was used to condition media of C2C12 myotubes and evaluate change in intracellular signalling and *de novo* MPS. Our findings show that media conditioned by WPH-fed serum stimulated kinases of the mTOR pathway and MPS *in vitro*, however media conditioned by NEAA-fed serum did not.

220

221 As expected, plasma EAA concentration, including leucine, were not significantly elevated from fasting levels  
222 following NEAA ingestion, but were increased following WPH ingestion (**Table 2**). Elevated plasma levels of  
223 EAA post protein feeding have previously been shown to robustly increase MPS (15, 26). Rennie and colleagues  
224 reported that an increase of ~80  $\mu\text{mol/L}$  in extracellular leucine is required to increase MPS *in vivo* (27, 28). Here,  
225 we observed an increase greater than ~200 $\mu\text{mol/L}$  for WPH-fed, however, this threshold was not reached in  
226 NEAA-fed condition and likely explains the lack of activation of MPS in our model, confirming NEAA as an  
227 effective isonitrogenous non-bioactive control.

228 Several humoral factors may act individually or collectively to stimulate MPS. Whereas circulating EAA are  
229 thought to be the primary drivers of MPS, protein ingestion has been shown to induce an increase in insulin, which  
230 is deemed 'permissive' with respect to MPS (29). In this study, we report a small increase (~40 - 45%) in  
231 circulating insulin with ingestion of both WPH and NEAA. As reviewed elsewhere (30) and following a recent  
232 meta-analysis (31), large increases in MPS are due to EAA regulating anabolic responses, whereas insulin  
233 regulates anti-catabolic (MPB) responses independent of AA availability (30, 31). Insulin, even in low  
234 concentrations as observed here (WPH:  $133 \pm 38$ ; NEAA  $95 \pm 31$ ), has been shown to attenuate MPB *in vivo* (32),  
235 however, this is not thought to impact MPS (the focus of this paper) when EAA delivery is not increased as in the  
236 case of the non-bioactive NEAA control. Consumption of NEAA did result in insulin-mediated clearance of EAAs  
237 from the circulation with small reductions in circulating EAAs ranging from 1-10 %. As a result, we postulate  
238 that only an elevation in circulating EAA would result in increased signalling and MPS in response to media  
239 conditioned by *ex vivo* protein-fed serum. Therefore, in the absence of an increase in circulating EAA as observed  
240 here, we anticipate that an isonitrogenous NEAA formulation can act as an effective non-bioactive control for  
241 further investigation of the effect of protein feeding on MPS in this model.

242 The potential of media conditioned by *ex vivo* human serum fed with isonitrogenous NEAA or WPH to activate  
243 MPS in C2C12 myotubes was measured by phosphorylation of mTOR and its downstream molecular proteins  
244 P70S6K and 4E-BP1. Dickinson and colleagues determined that activation of mTOR and its downstream  
245 signalling proteins P70S6K and 4E-BP1 is required for stimulation of human skeletal MPS by EAA (33). Addition  
246 of NEAA-fed serum to condition cell media did not stimulate mTOR, P70S6K or 4E-BP1 phosphorylation in  
247 C2C12 skeletal muscle cells. This confirms a lack of bioactivity for the activation of MPS in the NEAA  
248 formulation. In comparison, media conditioned by WPH-fed serum significantly increased phosphorylation of

mTOR, P70S6K and 4E-BP1, expressed as absolute values (**Figure 1A, 2A, 2C**), normalised relative to fasted serum (**Figure 1B, 2B, 2D**) and in comparison to NEAA-fed. These *in vitro* data confirm the bioactivity of WPH to activate MPS. Furthermore, activation of mTOR, P70S6K and 4E-BP1 with media conditioned by WPH-fed serum resulted in significantly greater stimulation of *de novo* MPS than media conditioned by NEAA-fed serum (**Figure 3B**), providing further validation of the NEAA formulation used in this study as an isonitrogenous, non-bioactive control.

In this study, we have demonstrated that an isonitrogenous NEAA supplement can be used as a non-bioactive control for MPS in protein feeding studies. As discussed, NEAA have previously been demonstrated not to be primarily responsible or required to stimulate MPS (1-3, 17). Similarly, unlike a bioactive WPH supplement, the isonitrogenous non-bioactive NEAA control used here did not alter protein signalling activity of mTOR, P70S6K and 4E-BP1 or MPS levels relative to its corresponding fasted serum. This suggests that in acute feeding studies, this isonitrogenous non-bioactive NEAA supplement can serve as an appropriate control.

## 5. Conclusions

In conclusion, we have proposed and demonstrated the use of an isonitrogenous NEAA control that does not affect levels of circulating biomarkers, does not mediate signalling through the mTOR pathway and neither augments nor attenuates MPS when used to condition media of skeletal muscle cells *in vitro*. We have also demonstrated that an isonitrogenous non-bioactive NEAA control can be used as a comparator against a bioactive WPH in this model. This study also provides further evidence on the use of pre- and post-fed *ex vivo* human serum in regulating MPS *in vitro*.

## 6. Acknowledgements

This work was supported by Food for Health Ireland (Enterprise Ireland grant TC20130001 to PMJ & BPC).

## Author Contributions

BPC, PMJ: conception, design, interpretation of data, drafting and revising the manuscript critically for important intellectual content. RJF, ABN: BP, MP, MAB: data acquisition, analysis, interpretation of data, drafting and revising of the manuscript.

## References

1. Borsheim E, Tipton KD, Wolf SE, Wolfe RR. Essential amino acids and muscle protein recovery from resistance exercise. *American journal of physiology Endocrinology and metabolism*. 2002;283(4):E648-57.
2. Smith K, Reynolds N, Downie S, Patel A, Rennie MJ. Effects of flooding amino acids on incorporation of labeled amino acids into human muscle protein. *The American journal of physiology*. 1998;275(1 Pt 1):E73-8.
3. Volpi E, Kobayashi H, Sheffield-Moore M, Mittendorfer B, Wolfe RR. Essential amino acids are primarily responsible for the amino acid stimulation of muscle protein anabolism in healthy elderly adults. *The American journal of clinical nutrition*. 2003;78(2):250-8.
4. Tipton KD, Gurkin BE, Matin S, Wolfe RR. Nonessential amino acids are not necessary to stimulate net muscle protein synthesis in healthy volunteers. *The Journal of nutritional biochemistry*. 1999;10(2):89-95.
5. Morton RW, Murphy KT, McKellar SR, Schoenfeld BJ, Henselmans M, Helms E, et al. A systematic review, meta-analysis and meta-regression of the effect of protein supplementation on resistance training-induced gains in muscle mass and strength in healthy adults. *British journal of sports medicine*. 2018;52(6):376-84.
6. Phillips SM. The impact of protein quality on the promotion of resistance exercise-induced changes in muscle mass. *Nutrition & metabolism*. 2016;13:64.
7. Xu ZR, Tan ZJ, Zhang Q, Gui QF, Yang YM. Clinical effectiveness of protein and amino acid supplementation on building muscle mass in elderly people: a meta-analysis. *PloS one*. 2014;9(9):e109141.
8. Xu ZR, Tan ZJ, Zhang Q, Gui QF, Yang YM. The effectiveness of leucine on muscle protein synthesis, lean body mass and leg lean mass accretion in older people: a systematic review and meta-analysis. *The British journal of nutrition*. 2015;113(1):25-34.
9. EFSA Panel on Dietetic Products NaAENP. Draft guidance on the scientific requirements for health claims related to muscle function and physical performance. *EFSA Journal*. 2018;16(10):5434.
10. Bohe J, Low A, Wolfe RR, Rennie MJ. Human muscle protein synthesis is modulated by extracellular, not intramuscular amino acid availability: a dose-response study. *The Journal of physiology*. 2003;552(Pt 1):315-24.
11. Smith K, Barua JM, Watt PW, Scrimgeour CM, Rennie MJ. Flooding with L-[1-13C]leucine stimulates human muscle protein incorporation of continuously infused L-[1-13C]valine. *The American journal of physiology*. 1992;262(3 Pt 1):E372-6.
12. Atherton PJ, Smith K, Etheridge T, Rankin D, Rennie MJ. Distinct anabolic signalling responses to amino acids in C2C12 skeletal muscle cells. *Amino Acids*. 2010;38(5):1533-9.
13. Atherton PJ, Kumar V, Selby AL, Rankin D, Hildebrandt W, Phillips BE, et al. Enriching a protein drink with leucine augments muscle protein synthesis after resistance exercise in young and older men. *Clinical nutrition*. 2017;36(3):888-95.
14. Koopman R, Wagenmakers AJ, Manders RJ, Zorenc AH, Senden JM, Gorselink M, et al. Combined ingestion of protein and free leucine with carbohydrate increases postexercise muscle protein synthesis in vivo in male subjects. *American journal of physiology Endocrinology and metabolism*. 2005;288(4):E645-53.
15. Wilkinson DJ, Bukhari SSI, Phillips BE, Limb MC, Cegielski J, Brook MS, et al. Effects of leucine-enriched essential amino acid and whey protein bolus dosing upon skeletal muscle protein synthesis at rest and after exercise in older women. *Clinical nutrition*. 2017.
16. Wilkinson DJ, Hossain T, Hill DS, Phillips BE, Crossland H, Williams J, et al. Effects of leucine and its metabolite beta-hydroxy-beta-methylbutyrate on human skeletal muscle protein metabolism. *J Physiol*. 2013;591(11):2911-23.
17. Wilkinson SB, Kim PL, Armstrong D, Phillips SM. Addition of glutamine to essential amino acids and carbohydrate does not enhance anabolism in young human males following exercise.

- Applied physiology, nutrition, and metabolism = Physiologie appliquee, nutrition et metabolisme. 2006;31(5):518-29.
18. Carson BP, Patel B, Amigo-Benavent M, Pauk M, Kumar Gujulla S, Murphy SM, et al. Regulation of muscle protein synthesis in an in vitro cell model using ex vivo human serum. *Experimental physiology*. 2018.
19. Pennings B, Boirie Y, Senden JM, Gijsen AP, Kuipers H, van Loon LJ. Whey protein stimulates postprandial muscle protein accretion more effectively than do casein and casein hydrolysate in older men. *The American journal of clinical nutrition*. 2011;93(5):997-1005.
20. Tang JE, Moore DR, Kujbida GW, Tarnopolsky MA, Phillips SM. Ingestion of whey hydrolysate, casein, or soy protein isolate: effects on mixed muscle protein synthesis at rest and following resistance exercise in young men. *Journal of applied physiology*. 2009;107(3):987-92.
21. Atherton PJ, Etheridge T, Watt PW, Wilkinson D, Selby A, Rankin D, et al. Muscle full effect after oral protein: time-dependent concordance and discordance between human muscle protein synthesis and mTORC1 signaling. *The American journal of clinical nutrition*. 2010;92(5):1080-8.
22. McCormack WG, Cooke JP, O'Connor WT, Jakeman PM. Dynamic measures of skeletal muscle dialysate and plasma amino acid concentration in response to exercise and nutrient ingestion in healthy adult males. *Amino acids*. 2017;49(1):151-9.
23. Power-Grant O, McCormack WG, Ramia De Cap M, Amigo-Benavent M, Fitzgerald RJ, Jakeman P. Evaluation of the antioxidant capacity of a milk protein matrix in vitro and in vivo in women aged 50-70 years. *International journal of food sciences and nutrition*. 2016;67(3):325-34.
24. Murphy SM, Kiely M, Jakeman PM, Kiely PA, Carson BP. Optimization of an in vitro bioassay to monitor growth and formation of myotubes in real time. *Biosci Rep*. 2016;36(3).
25. Goodman CA, Mabrey DM, Frey JW, Miu MH, Schmidt EK, Pierre P, et al. Novel insights into the regulation of skeletal muscle protein synthesis as revealed by a new nonradioactive in vivo technique. *FASEB J*. 2011;25(3):1028-39.
26. Mitchell WK, Phillips BE, Hill I, Greenhaff P, Lund JN, Williams JP, et al. Human skeletal muscle is refractory to the anabolic effects of leucine during the postprandial muscle-full period in older men. *Clinical science*. 2017;131(21):2643-53.
27. Bohe J, Low JF, Wolfe RR, Rennie MJ. Latency and duration of stimulation of human muscle protein synthesis during continuous infusion of amino acids. *J Physiol*. 2001;532(Pt 2):575-9.
28. Rennie MJ. Exercise- and nutrient-controlled mechanisms involved in maintenance of the musculoskeletal mass. *Biochemical Society transactions*. 2007;35(Pt 5):1302-5.
29. Greenhaff PL, Karagounis LG, Peirce N, Simpson EJ, Hazell M, Layfield R, et al. Disassociation between the effects of amino acids and insulin on signaling, ubiquitin ligases, and protein turnover in human muscle. *American journal of physiology Endocrinology and metabolism*. 2008;295(3):E595-604.
30. Atherton PJ, Smith K. Muscle protein synthesis in response to nutrition and exercise. *J Physiol*. 2012;590(5):1049-57.
31. Abdulla H, Smith K, Atherton PJ, Idris I. Role of insulin in the regulation of human skeletal muscle protein synthesis and breakdown: a systematic review and meta-analysis. *Diabetologia*. 2016;59(1):44-55.
32. Wilkes EA, Selby AL, Atherton PJ, Patel R, Rankin D, Smith K, et al. Blunting of insulin inhibition of proteolysis in legs of older subjects may contribute to age-related sarcopenia. *The American journal of clinical nutrition*. 2009;90(5):1343-50.
33. Dickinson JM, Fry CS, Drummond MJ, Gundermann DM, Walker DK, Glynn EL, et al. Mammalian target of rapamycin complex 1 activation is required for the stimulation of human skeletal muscle protein synthesis by essential amino acids. *The Journal of nutrition*. 2011;141(5):856-62.



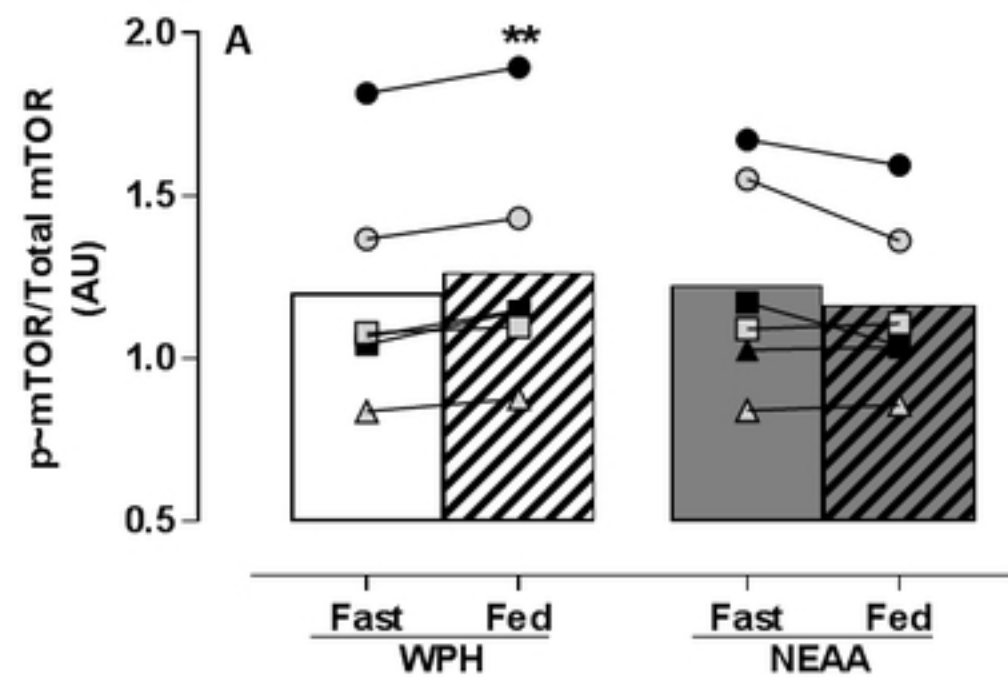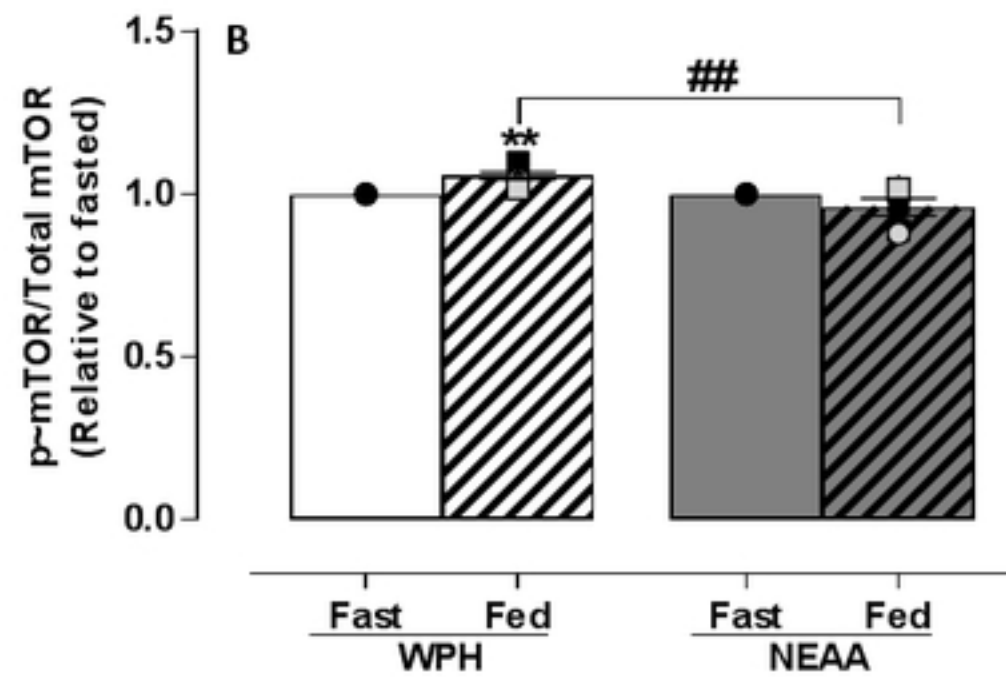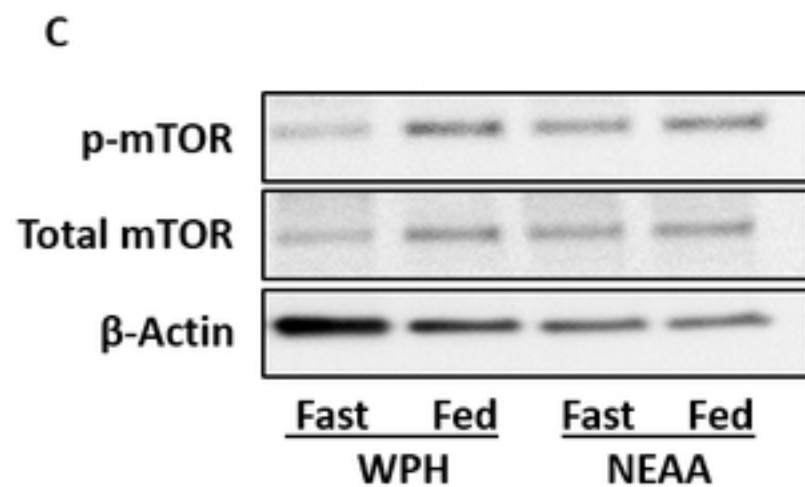



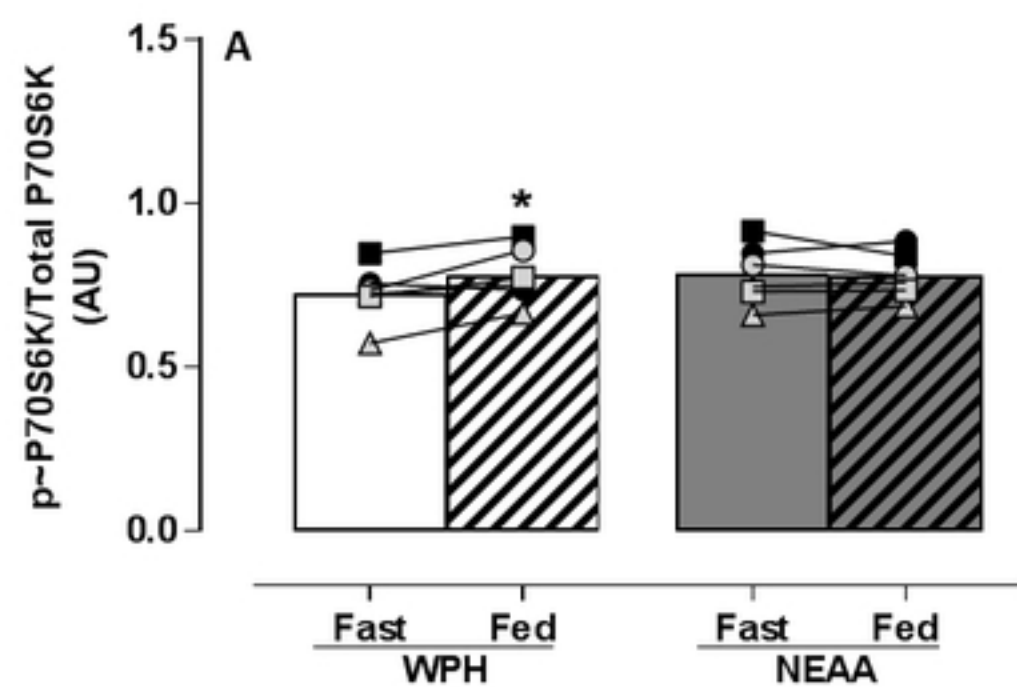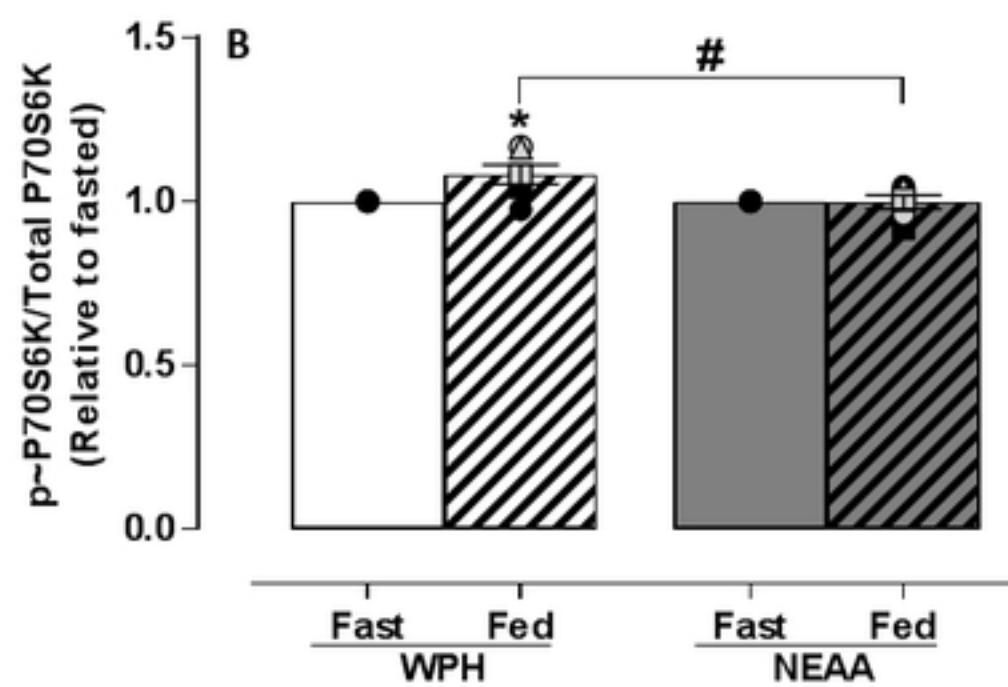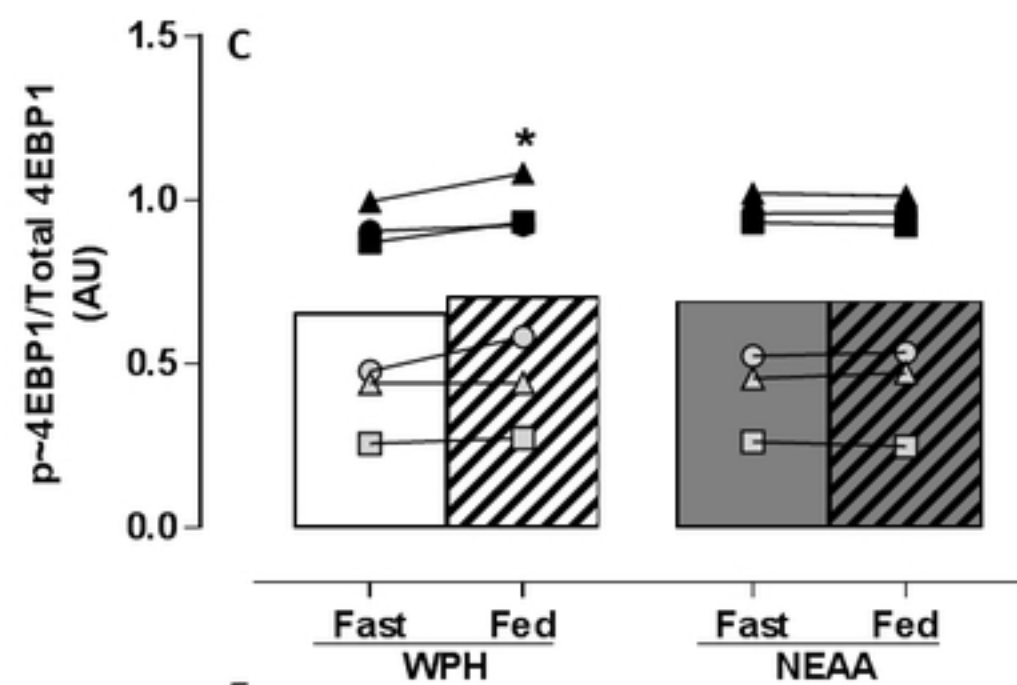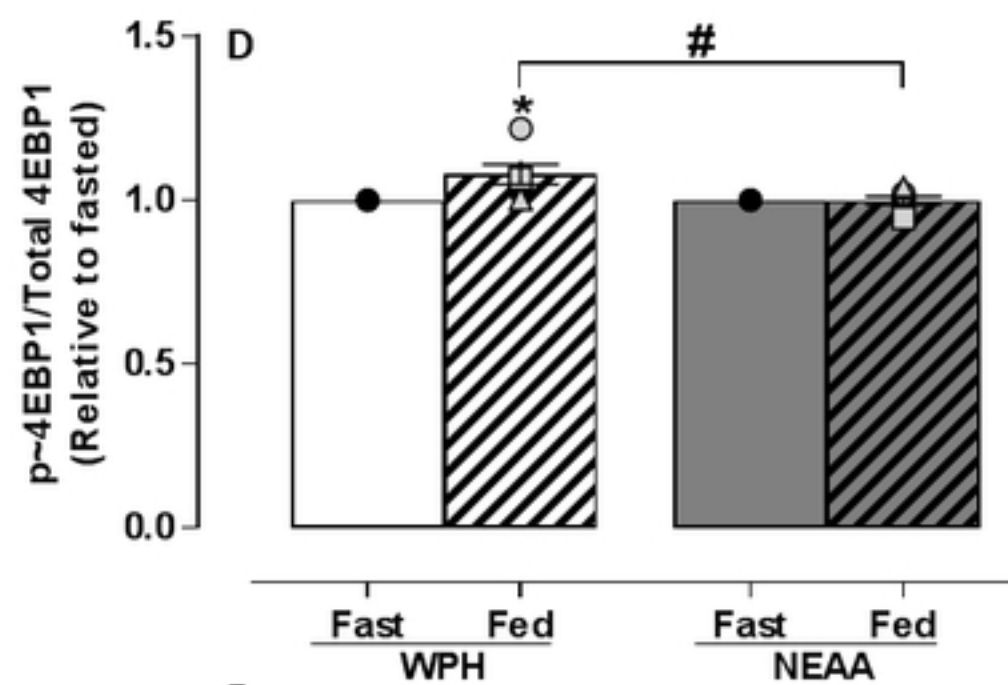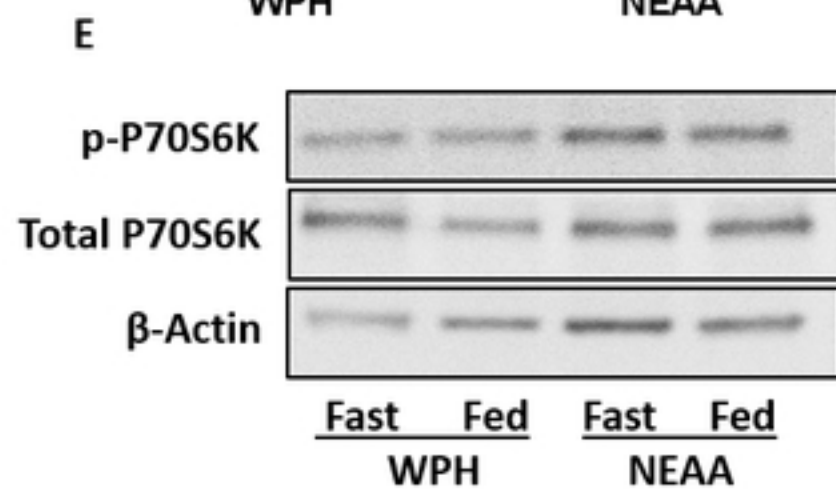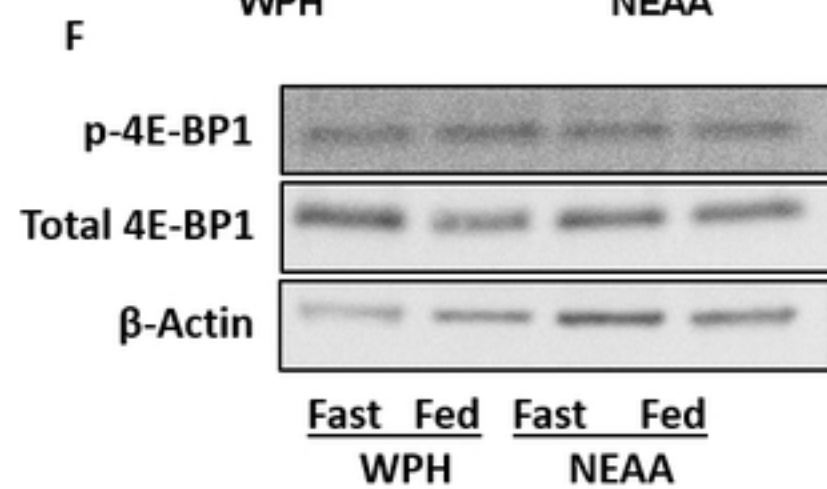

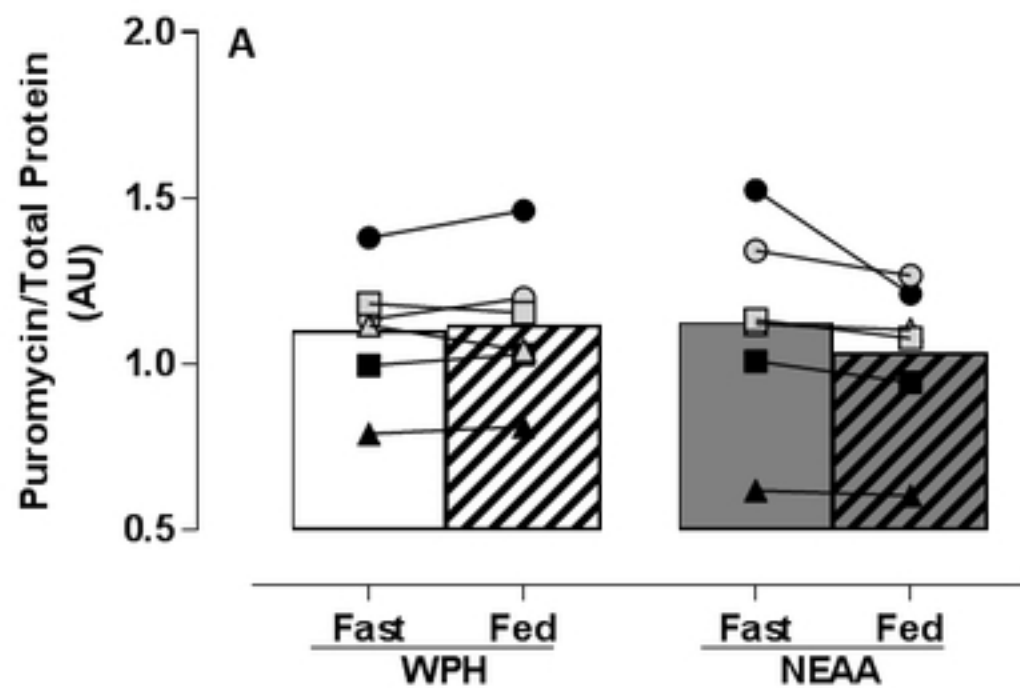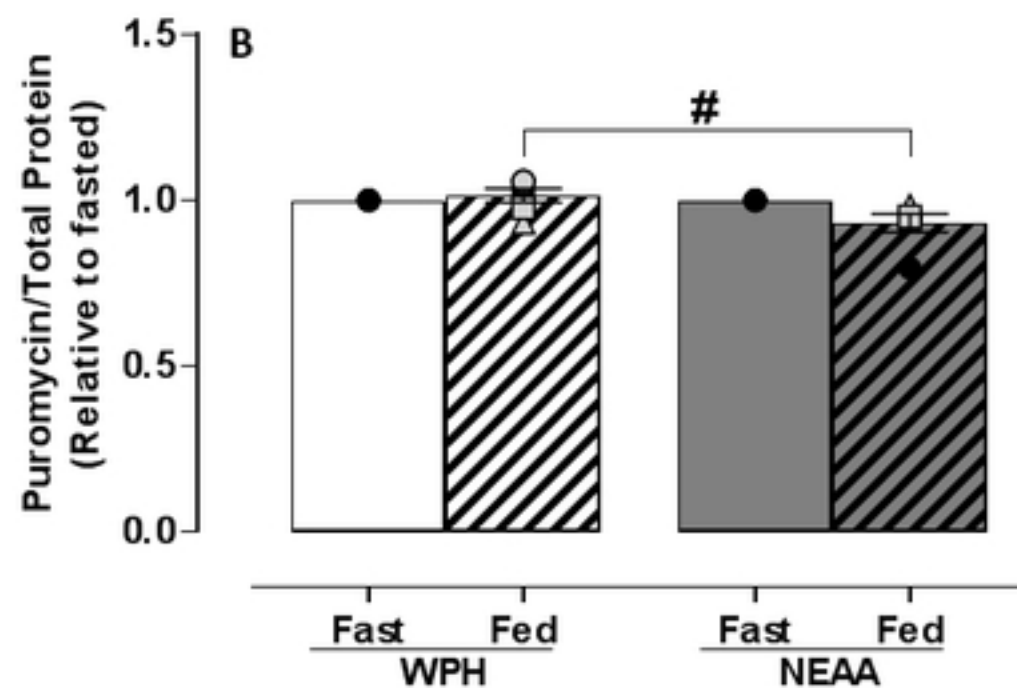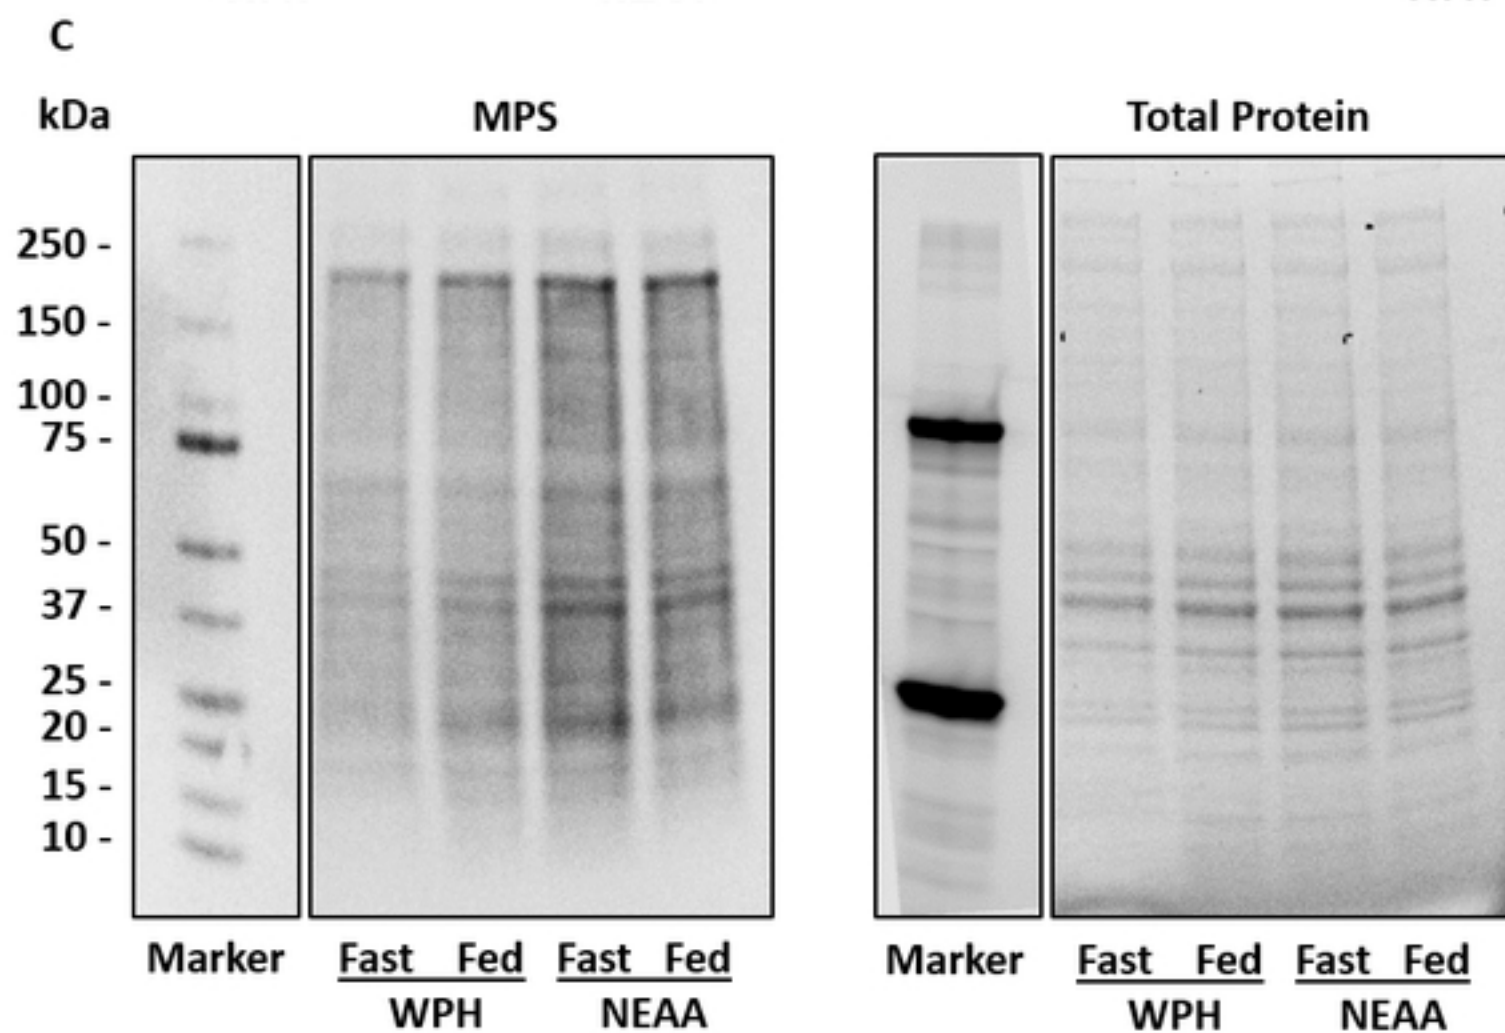

Source: https://www.biorxiv.org/content/10.1101/713768v1.full.pdf
